# Supplementary material
Source: HighWire-hosted journal article supplement (https://bmjopen.bmj.com/content/11/3/e045343)

**Title: Pandemic impacts on healthcare utilisation: a systematic review**

Authors names: R Moynihan, S Sanders, ZA Michaleff, AM Scott, J Clark, EJ To, M Jones, E Kitchener, M Fox, M Johansson, E Lang, A Duggan, IA Scott, L Albarqouni.

**Supplementary File 5 –**

- 5.1 Table of Study Characteristics and reference list of all included studies.
- 5.2 Table of Results of the primary outcome of the included studies
- 5.3 Table of Results of secondary outcomes of the included studies
- 5.4 Figures of changes in healthcare utilisations reported in included studies

**Supplementary Table. Characteristics of Included Studies of pandemic related changes in healthcare utilization**

| Author; Country; Scope; Design                              | Setting; Population                                                                                           | Pandemic and comparator periods*      | Primary Outcomes                                                                 | Secondary Outcomes |
|-------------------------------------------------------------|---------------------------------------------------------------------------------------------------------------|---------------------------------------|----------------------------------------------------------------------------------|--------------------|
| Abdulmalik; Qatar; National; Same period single year        | Outpatient/Primary care; 27 primary health care centres                                                       | March - May; 2020 vs. 2018-19         | Overall utilization of all primary healthcare services across all health centres | N/A                |
| Andersson; Denmark; National; Same period single year       | Hospital; Danish Nationwide Patient Registry                                                                  | March 12 - March 31; 2020 vs. 2019    | Incidence rates of new-onset HF and hospitalization for worsening HF             | Mortality          |
| Angoulvant; France; Multi-centre; Time trend multiple years | ED & Hospital; 6 Paediatric EDs from academic hospitals being part of Assistance Publique – Hôpitaux de Paris | March 18 - April 19; 2020 vs. 2017-19 | Number of hospital visits and admissions                                         | N/A                |
| Antonucci; Italy; Multi-centre; Same period single year     | ED & Hospital; 3 high volume urology departments in Rome, Italy                                               | March - April; 2020 vs. 2019          | Number of ED admissions for urolithiasis; Number of hospitalisations             | N/A                |
| Athiel; France; Multi-centre; Same period single year       | ED & Hospital; 12 gynaecological emergency units of the Greater Paris University Hospitals                    | March - May; 2020 vs. 2019            | Number of emergency gynaecological hospitalisations                              | N/A                |

|                                                            |                                                                                                                                                   |                                      |                                                                                                    |                              |
|------------------------------------------------------------|---------------------------------------------------------------------------------------------------------------------------------------------------|--------------------------------------|----------------------------------------------------------------------------------------------------|------------------------------|
| Baum; USA; National;<br>Time trend single year             | Hospital; Veterans Affairs Hospitals' Corporate Data Warehouse, a national repository of electronic health records from visits to any VA facility | March 11 – April 21; 2020 vs 2019    | All admissions for any condition                                                                   | N/A                          |
| Bayles; USA; Multi-centre; Same period single year         | ED; 3 acute care facilities from the Marin County Department of Health and Human Services                                                         | March 17 - May 4; 2020 vs. 2018-19   | Average number of daily ED visits                                                                  | N/A                          |
| Benazzo; Italy; Multi-centre; Same period single year      | ED & Hospital; 15 orthopaedic and trauma units                                                                                                    | February 23 - April 4; 2020 vs. 2019 | Outpatient consultations; Trauma ED visits; Surgeries                                              | N/A                          |
| Bollman; Germany; Multi-centre; Same period single year    | Hospital; 66 Helios hospitals                                                                                                                     | March 1 - April 30; 2020 vs. 2019    | Admissions for heart failures and arrhythmias                                                      | N/A                          |
| Bozovich; Argentina; Multi-centre; Same period single year | ED & Hospital; 31 private hospitals                                                                                                               | April 1 - April 30; 2020 vs. 2019    | ED consultations and procedures                                                                    | N/A                          |
| Braiteh; USA; Multi-centre; Same period single year        | Hospital; 4 hospitals                                                                                                                             | March - April; 2020 vs. 2019         | Admissions for any cause; Presentations for Acute Coronary Syndrome (also describes as admissions) | Rates of STEMI versus NSTEMI |

|                                                               |                                                                                                                                                                              |                                      |                                                                                                                                                                                                |                                                     |
|---------------------------------------------------------------|------------------------------------------------------------------------------------------------------------------------------------------------------------------------------|--------------------------------------|------------------------------------------------------------------------------------------------------------------------------------------------------------------------------------------------|-----------------------------------------------------|
| Bramer; USA; Multi-centre; Same period single year            | Community; vaccinations from one state immunization system                                                                                                                   | May; 2020 vs. 2017-19                | Proportion of children with up-to-date status for all recommended vaccines                                                                                                                     | N/A                                                 |
| Butt; Qatar; Multi-centre; Same period single year            | ED; 2 hospitals in Qatar that see over 80% of patients in Qatar with suspected Acute Coronary Syndrome                                                                       | March - April; 2020 vs. 2019         | Total ED visits; ED presentations with cardiac symptoms                                                                                                                                        | Rates presenting with Acute Coronary Syndrome (ACS) |
| Cano-Valderrama; Spain; Multi-centre; Same period single year | Hospital; 3 tertiary care centres                                                                                                                                            | March 16 - April 26; 2020 vs. 2019   | Acute care surgeries                                                                                                                                                                           | SOFA scores                                         |
| Cheek; Australia; Multi-centre; Same period single year       | ED; 2 tertiary hospitals and 2 urban district hospitals                                                                                                                      | March 22 - May 23; 2020 vs. 2019     | Number of attendances at paediatric ED; Number of attendances at paediatric ED for mental health diagnoses; Number of neonatal presentations                                                   | N/A                                                 |
| Chou; Taiwan; Multi-centre; Same period single year           | Community/Primary care; Hospice homecare services, hospice inpatient services and non-hospice services provided by 2 branches of health care organisation in Northern Taiwan | January - April; 2020 vs. 2019       | Number of hospice home care visits; Number of new enrolments in hospice home care; Bed occupancy rates in hospice and non-hospice units; Monthly patient days in hospice and non-hospice units | N/A                                                 |
| Claeys; Belgium; National; Same period single year            | Hospital; 36 of the 49 PCI-capable hospitals in the Belgian STEMI database and Belgian Coronary Stent Registry                                                               | March 13 - April 3; 2020 vs. 2017-19 | Number of STEMI admission                                                                                                                                                                      | Mortality; % cardiac arrest; Killip class           |

|                                                                    |                                                                                                    |                                       |                                                                                                                       |                                                                        |
|--------------------------------------------------------------------|----------------------------------------------------------------------------------------------------|---------------------------------------|-----------------------------------------------------------------------------------------------------------------------|------------------------------------------------------------------------|
| Clerici; Italy; Multi-centre; Same period single year              | Hospital; 7 general hospital psychiatric wards in the Lombardy region of Italy                     | February 21 - March 31; 2020 vs. 2019 | Average daily number of admissions by week, total number of weekly admissions; Annual rates of admissions/1000 adults | Number of voluntary and involuntary admissions                         |
| Collado-Mesa; USA; Multi-centre; Same period single year           | Community/Outpatient; five breast imaging centres                                                  | April; 2020 vs. 2018-19               | Number of breast imaging examinations; Number of image-guided procedures                                              | Proportion of positive biopsy of image guided biopsy                   |
| CVD-Covid-UK Consortium; UK; Multi-centre; Same period single year | Hospital; 9 hospitals in England and Scotland                                                      | March 23 - May 10; 2020 vs. 2018-19   | Number of ED attendances and hospital admissions                                                                      | procedures for cardiac, cerebrovascular, other vascular conditions     |
| De Filippo; Italy; Multi-centre; Same period single year           | Hospital; 15 hospitals in Northern Italy                                                           | February 20 - March 31; 2020 vs. 2019 | Incidence rate ratio for hospital admissions for ACS                                                                  | Incidence rate ratio for STEMI/NSTEMI                                  |
| de Havenon; USA; Multi-centre; Same period single year             | Hospital; 65 academic and community hospitals                                                      | February - March; 2020 vs. 2018-19    | Number of hospitalisations for stroke and ACS; Number of procedures for stroke and ACS                                | N/A                                                                    |
| De Rosa; Italy; Multi-centre; Same period single year              | Hospital; cardiac care units at 54 Italian hospitals affiliated with Italian Society of Cardiology | March 12 - March 19; 2020 vs. 2019    | Number of admissions for acute myocardial infarction                                                                  | Case fatality rates; Number of admissions per diagnosis (STEMI/NSTEMI) |

|                                                            |                                                                                                                                                           |                                       |                                                                                 |                                                              |
|------------------------------------------------------------|-----------------------------------------------------------------------------------------------------------------------------------------------------------|---------------------------------------|---------------------------------------------------------------------------------|--------------------------------------------------------------|
| Diegoli; Brazil; Multi-centre; Same period single year     | Hospital; 6 hospitals in Joinville, Brazil                                                                                                                | March 17 - April 15; 2020 vs. 2019    | Admissions for stroke/100000 inhabitants                                        | Admissions for severe stroke (NIH stroke scale score)        |
| Egol; USA; Multi-centre; Same period single year           | ED & Hospital; The NYU Langone Orthopaedic Department is responsible for the musculoskeletal care at 7 different hospitals within the New York City area. | February 1 - April 15; 2020 vs. 2019  | Number of ED presentations with hip fracture                                    | Mortality; Non/operative case                                |
| Enache; Monaco; National; Same period single year          | ED & Hospital; Monaco public health care system                                                                                                           | March; 2020 vs. 2019                  | Number cardiovascular and emergency admissions                                  | N/A                                                          |
| Franco; Italy; Multi-centre; Same period single year       | Hospital; 10 cardiology centres in Northern Italy                                                                                                         | February 23 - March 28; 2020 vs. 2019 | Number of hospitalisations for NSTEMI                                           | N/A                                                          |
| Frankfurter; Canada; Multi-centre; Same period single year | ED & Hospital; University Health Network (Toronto General Hospital and Toronto Western Hospital), in Toronto, Canada                                      | March 1 - April 19; 2020 vs. 2019     | Number ED visits and hospitalised with heart failure                            | ICU admission; Mortality; Hospitalisation; NYHA class III-IV |
| Garcia; USA; Multi-centre; Time trend single year          | Hospital; 18 sites representing primary percutaneous coronary intervention (PPCI) hospitals and healthcare systems across the US                          | March - April; 2020 vs. 2019          | Monthly volume of cardiac catheterisation leading to intervention (angiography) | N/A                                                          |

|                                                            |                                                                                                    |                                      |                                                                             |                 |
|------------------------------------------------------------|----------------------------------------------------------------------------------------------------|--------------------------------------|-----------------------------------------------------------------------------|-----------------|
| Gawron; USA; National; Time trend single year              | Hospital & Outpatient; 170 medical centres and 1074 outpatient sites                               | March - April; 2020 vs. 2019         | Average number of upper gastrointestinal endoscopies per month              | N/A             |
| Giuntoli; Italy; Multi-centre; Same period single year     | Hospital; three of the major trauma and elective orthopaedic surgery centres of north-west Tuscany | March; 2020 vs. 2019                 | Number of patients treated                                                  | Hospitalisation |
| Gruttadauria; Italy; Multi-centre; Same period single year | Hospital; 22 Italian Liver Transplant Programs.                                                    | March 1 - March 15; 2020 vs. 2018-19 | Number of liver transplants                                                 | N/A             |
| Hartnett; USA; Multi-centre; Same period single year       | ED; subset of hospitals in 47 states capturing approximately 73% of ED visits in the USA           | March 29 - April 25; 2020 vs. 2019   | Mean weekly ED presentations                                                | N/A             |
| Houshyar; USA; Multi-centre; Same period single year       | ED & Hospital; 5 University of California Health Centres with academic radiology programs.         | March 19 - April 2; 2020 vs. 2019    | Daily number of ED radiologic examinations                                  | N/A             |
| Hoyer; Germany; Multi-centre; Same period single year      | ED & Hospital; 4 German comprehensive stroke centres.                                              | March 16 - April 12; 2020 vs. 2019   | Numbers of patients admitted with final diagnoses of ischemic stroke or TIA | TIA/ Stroke     |

|                                                          |                                                                                                                 |                                       |                                                            |                                              |
|----------------------------------------------------------|-----------------------------------------------------------------------------------------------------------------|---------------------------------------|------------------------------------------------------------|----------------------------------------------|
| Isba; UK; Multi-centre; Same period single year          | ED; 2 hospitals in greater Manchester                                                                           | February - March; 2020 vs. 2019       | Weekly PED attendances                                     | N/A                                          |
| Jasne; USA; Multi-centre; Same period single year        | ED & Hospital; 3 hospitals in New Haven, Connecticut                                                            | March 1 - April 28; 2020 vs. 2019     | Weekly stroke code calls                                   | N/A                                          |
| Kadavath; USA; Multi-centre; Same period single year     | Hospital; 12 fellowship training sties                                                                          | March 1 - April 15; 2020 vs. 2019     | Number of invasive cardiac procedures                      | N/A                                          |
| Kerleroux; France; Multi-centre; Same period single year | Hospital; 32 centres in all French administrative regions.                                                      | February 15 - March 30; 2020 vs. 2019 | Number of patients receiving MT between study periods      | % unwitnessed onset; Baseline NIHSS; ASPECTs |
| Kessler; Germany; Multi-centre; Same period single year  | Hospital; 15 cardiac care centres distributed across Germany providing 24/7 interventional cardiac care.        | March 1 - April 30; 2020 vs. 2019     | Number of patients presenting with Acute Coronary Syndrome | STEMI/NSTEMI                                 |
| Kim; USA; Multi-centre; Same period single year          | ED; seven EDs include one urban academic hospital, five suburban community hospitals, and one free-standing ED. | March 8 - May 2; 2020 vs. 2019        | Weekly Emergency Department visits                         | N/A                                          |



|                                                                 |                                                                                                                        |                                          |                                                                                                                                                    |                                |
|-----------------------------------------------------------------|------------------------------------------------------------------------------------------------------------------------|------------------------------------------|----------------------------------------------------------------------------------------------------------------------------------------------------|--------------------------------|
| Kolbaek; Denmark;<br>Multi-centre; Same<br>period single year   | Community/Outpatient;<br>Psychiatric services                                                                          | February 23 - May 2;<br>2020 vs. 2019    | Number of referrals to<br>psychiatric service                                                                                                      | N/A                            |
| Krenzlin; Germany;<br>Multi-centre; Same<br>period single year  | Hospital; Two major<br>neurosurgical departments in<br>Germany                                                         | March 16 - April 19;<br>2020 vs. 2018-19 | Number of emergency<br>admissions                                                                                                                  | N/A                            |
| Langdon-Embry; USA;<br>Multi-centre; Same<br>period single year | Community; childhood<br>immunisation facilities in New<br>York City                                                    | March 16 – May 31;<br>2020 vs. 2019      | Number of childhood vaccine<br>doses administered; Number of<br>unique facilities reporting<br>administration of at least one<br>childhood vaccine | N/A                            |
| Lantelme; France;<br>Multi-centre; Same<br>period single year   | Hospital; 3 public centres in<br>Lyon.                                                                                 | March 9 - April 5;<br>2020 vs. 2019      | Weekly rate of hospital<br>admissions for myocardial<br>infarction                                                                                 | N/A                            |
| Lazaros; Greece;<br>Multi-centre; Same<br>period single year    | Hospital; 2 large hospitals of the<br>National Health System<br>belonging to the larger<br>Metropolitan area of Athens | March 12 - May 7;<br>2020 vs. 2019       | Number of cardiac surgery<br>procedures                                                                                                            | Emergency vs non-<br>emergency |
| Lazzerini; Italy; Multi-<br>centre; Same period<br>single year  | ED; 5 Pediatric ED (three third-<br>level referral hospitals and two<br>second-level hospitals)                        | March 1 - March 27;<br>2020 vs. 2019     | Number of paediatric<br>emergency department visits                                                                                                | N/A                            |

|                                                          |                                                              |                                         |                                               |                                                   |
|----------------------------------------------------------|--------------------------------------------------------------|-----------------------------------------|-----------------------------------------------|---------------------------------------------------|
| Li; Taiwan; Multi-centre; Same period single year        | Hospital; 40 major hospitals                                 | February - April; 2020 vs. 2019         | Number of patients admitted for STEMI         | N/A                                               |
| Lui; Hong Kong; National; Same period single year        | Hospital; all public hospitals                               | January 21 - March 31; 2020 vs. 2017-19 | Upper and lower endoscopies                   | Positive rate for colon cancer and gastric cancer |
| Mafham; UK; National; Same period single year            | Hospital; 147 acute NHS hospital trusts                      | January 6 - May 30; 2020 vs. 2019       | Admissions for Acute Coronary Syndromes       | Proportions of STEMI vs NSTEMI                    |
| Manzoni; Italy; Multi-centre; Same period single year    | ED; 2 emergency paediatric departments                       | March - April; 2020 vs. 2019            | Volume of ED visits                           | Hospitalisation                                   |
| Mazzatenta; Italy; Multi-centre; Same period single year | Hospital; 5 neurosurgery departments and 1 paediatric centre | March 13 - April 13; 2020 vs. 2018-19   | Outpatient consultations; Surgical activities | Urgent/nonurgent surgery                          |
| McDonald; UK; National; Same period single year          | Community; electronic patient records of vaccination         | March 2 - April 25; 2020 vs. 2019       | Hexavalent vaccines; MMR first vaccination    | N/A                                               |

|                                                                |                                                                                                                                                                             |                                       |                                                         |                                 |
|----------------------------------------------------------------|-----------------------------------------------------------------------------------------------------------------------------------------------------------------------------|---------------------------------------|---------------------------------------------------------|---------------------------------|
| Mitchell; Australia; Multi-centre; Time trend multiple years   | ED & Hospital; 2 Emergency Departments                                                                                                                                      | March 26 - April 25; 2020 vs. 2017-19 | Daily number of ED presentations                        | Triage category                 |
| Naidich; USA; Multi-centre; Same period single year            | Hospital & Outpatient; 92 centres across NY state                                                                                                                           | March 2 - April 18; 2020 vs. 2019     | Volume of imaging                                       | N/A                             |
| Norbash; USA; Multi-centre; Same period single year            | Hospital & Outpatient; 6 academic medical systems                                                                                                                           | January 6 - May 23; 2020 vs. 2019     | Volume of imaging                                       | N/A                             |
| Novara; Italy; Multi-centre; Same period single year           | ED; EDs within 8 academic and non-academic urology centres                                                                                                                  | March 12 - March 16; 2020 vs. 2019    | ED urological consults                                  | Triage category/hospitalisation |
| Onteddu; Multi-national; Multi-centre; Same period single year | Hospital; TriNetX, a global health collaborative clinical research platform collecting real-time electronic medical record data from a network of health care organizations | January 20 - May 16; 2020 vs. 2019    | Number of ischemic stroke patients                      | N/A                             |
| Papafakis; Greece; Multi-centre; Same period single year       | Hospital; Greek public hospitals with PCI capability, including a primary PCI service                                                                                       | March 2 - April 12; 2020 vs. 2019     | Number of patients admitted for Acute coronary syndrome | ACS presentation                |

|                                                          |                                                                                                 |                                    |                                                                                                              |                                                                              |
|----------------------------------------------------------|-------------------------------------------------------------------------------------------------|------------------------------------|--------------------------------------------------------------------------------------------------------------|------------------------------------------------------------------------------|
| Pignon; France; Multi-centre; Same period single year    | ED; 3 psychiatric emergency services                                                            | March 17 - April 13; 2020 vs. 2019 | Emergency psychiatric consultations                                                                          | Rates of hospitalisation                                                     |
| Pinar; France; Multi-centre; Same period single year     | Hospital; 8 academic urology departments                                                        | March 12 - March 27; 2020 vs. 2019 | Urological surgeries                                                                                         | N/A                                                                          |
| Polo Lopez; Spain; Multi-centre; Same period single year | Hospital; 13 public hospitals where most congenital heart disease surgery in Spain is performed | March 13 - May 13; 2020 vs. 2019   | Number of congenital heart disease surgeries                                                                 | N/A                                                                          |
| Pop; France; Multi-centre; Same period single year       | Hospital; 3 hospitals with stroke units                                                         | March 1 - March 31; 2020 vs. 2019  | Stroke alerts (following initial consult)                                                                    | Proportion of alerts resulting in admissions for stroke; Initial NIHSS score |
| Qasim; USA; Multi-centre; Same period single year        | ED; 4 adult and 2 paediatric Level 1 Trauma centres                                             | March 9 - April 19; 2020 vs. 2019  | Trauma contacts                                                                                              | Rates of highest acuity ("alerts")                                           |
| Range; France; Multi-centre; Time trend single year      | Hospital; 12 interventional cardiology centres                                                  | March 15 - April 4; 2020 vs. 2019  | Patients enrolled in Percutaneous Coronary Intervention registry (follows all STEMI patients undergoing PCI) | N/A                                                                          |

|                                                                |                                                            |                                       |                                        |                                                                                               |
|----------------------------------------------------------------|------------------------------------------------------------|---------------------------------------|----------------------------------------|-----------------------------------------------------------------------------------------------|
| Reeves; UK; Multi-centre; Time trend multiple years            | Hospital; University hospitals in one NHS Foundation Trust | March 22 - April 25; 2020 vs. 2016-19 | Admissions for STEMI and stroke        | N/A                                                                                           |
| Requena; Multi-national; Multi-centre; Same period single year | Community; 2 fertility facilities in Spain and 1 in Italy  | February 3 - March 23; 2020 vs. 2019  | Fertility related procedures           | N/A                                                                                           |
| Romaguera; Spain; Multi-centre; Same period single year        | Hospital; 10 percutaneous coronary intervention hospitals  | March 1 - April 19; 2020 vs. 2019     | STEMI admissions                       | Proportion of more severe Killip classes; Proportion of sudden cardiac death; mortality       |
| Scaramuzza; Italy; Multi-centre; Same period single year       | ED; 2 paediatric emergency departments                     | February 20 - March 30; 2020 vs. 2019 | Presentations to paediatric ED         | Reductions across different triage categories                                                 |
| Salerno; Italy; National; Same period single year              | Hospital; 35 endoscopy units in Italy                      | March; 2020 vs. 2019                  | Number of urgent endoscopic procedures | Proportion of positive procedures (i.e. diagnostic yield) for urgent EGDs and lower endoscopy |
| Santana; Portugal; National; Time trend multiple years         | ED; emergency services in mainland Portugal                | March; 2020 vs. 2019                  | Number of emergency episodes           | Triage category                                                                               |

|                                                        |                                                                                  |                                      |                                                                                     |                                                                                             |
|--------------------------------------------------------|----------------------------------------------------------------------------------|--------------------------------------|-------------------------------------------------------------------------------------|---------------------------------------------------------------------------------------------|
| Scholz; Germany; Multi-centre; Same period single year | Hospital; 41 percutaneous coronary intervention centres participating in a trial | March; 2020 vs. 2017-19              | Number of STEMI patients treated                                                    | Mortality; TIMI score                                                                       |
| Secco; Italy; Multi-centre; Same period single year    | Hospital; 3 high volume centres in North and Central Italy                       | March; 2020 vs. 2019                 | Number of admissions for ACS                                                        | Type of ACS; TIMI score; GRACE score; Admission peak hs-troponin; Mortality                 |
| Seiffert; Germany; National; Same period single year   | Hospital; Health insurance claims from second largest insurer in Germany         | March 2 - May 31; 2020 vs. 2019      | Rate of admissions/100000 insured for cardiovascular or cerebrovascular emergencies | Number per diagnosis (STEMI, NSTEMI, stroke, TIA); Number of invasive procedures; Mortality |
| Smalley; USA; Multi-centre; Same period single year    | ED; 20 EDs across a large Midwest integrated healthcare system                   | March 25 - April 24; 2020 vs. 2019   | Number of ED encounters; Number of behavioural health visits to the ED              | N/A                                                                                         |
| Tinay; Turkey; Multi-centre; Same period single year   | Hospital; Surgical urologic oncology practices                                   | March 11-April 11; 2020 vs. 2019     | Number of nondeferrable uro-oncological procedures                                  | ASA score                                                                                   |
| Toro; Chile; National; Time trend multiple years       | ED; public health hospitals, emergency care services in 16 regions of Chile      | March 8 - April 18; 2020 vs. 2015-19 | Number of emergency service consultations                                           | N/A                                                                                         |

|                                                               |                                                                                          |                                         |                                                                                                                                                                 |                                     |
|---------------------------------------------------------------|------------------------------------------------------------------------------------------|-----------------------------------------|-----------------------------------------------------------------------------------------------------------------------------------------------------------------|-------------------------------------|
| Toyoda; Multi-national; Multi-centre; Same period single year | Hospital; 3 liver speciality clinics                                                     | February 1 - May 1; 2020 vs. 2018-19    | Number of clinic visits; Number of ultrasounds performed; Number of CT/MRIs performed                                                                           | Visits in advanced disease patients |
| Wong; Hong Kong; National; Same period single year            | Hospital & Outpatient; 43 Hong Kong public hospitals and 122 outpatient clinics          | January 25 - March 27; 2020 vs. 2016-19 | Mean weekly orthopaedic operations; Mean weekly orthopaedic emergencies treated operatively                                                                     | Elective and emergency operations   |
| Xu; USA; Multi-centre; Same period single year                | Outpatient; retinal care centres                                                         | March 8 - May 16; 2020 vs. 2018-19      | Mean weekly office visits; Mean weekly intravitreal injections; Mean weekly optical coherence tomography, fluorescein angiography and indocyanine green testing | N/A                                 |
| Zhao; China; Multi-centre; Same period single year            | Hospital; 280 stroke centres across China participating in Big Data Observatory platform | January - February; 2020 vs. 2019       | Number of stroke admissions; Number of thrombolysis treatments; Number of thrombectomy treatments                                                               | N/A                                 |

Abbreviations: CT: Computed Tomography Scan; ED: Emergency Department; MRI: Magnetic resonance imaging; N/A: Not applicable; NIHSS: NIH Stroke Scale Score; NSTEMI: Non-ST elevation myocardial infarction; PED: Paediatric Emergency Department; STEMI: ST-elevation myocardial infarction; TIA: Transient Ischaemic Attack.

Note: \*This is the period of time analysed in this Systematic Review, not necessarily all of the time period reported in each study. For a few studies that did not clearly define the pandemic period, we defined that period using any indication/reference in the same article for a lockdown or a surge in the number of COVID-19 cases.

Study design label explanations: 'Same period single year' - Preinterruption measurement at a comparable time period in 2019 only with basic pre-post analysis (unadjusted or adjusted comparison of mean utilisation across the two comparator periods). An example is a study comparing utilisation in the month of March 2020 with utilisation in the month of March 2019; 'Same period multiple years' - Preinterruption measurement at comparable time periods in prior years (2 or more) with basic pre-post analysis. An example is a study comparing utilisation for weeks 10-16 of 2020 with utilisation during weeks 10-16 in 2019 and 2018 (using the average utilisation from the comparator years) ; 'Time trend single year' – This category refers to studies considering data

from an entire year preinterruption time period rather than a single month or period of weeks. An example is a study documenting utilisation for the period January 2019 to some time point in 2020. In these studies preinterruption utilisation trends may be modelled using data from the prior year to estimate predicted utilisation. This category also includes studies that do not model prior data but average utilisation across the prior year for comparison to a postinterruption period. An example is a study comparing the monthly average utilisation for the period Jan 1 2019 to Feb 29 2020 with the monthly average utilisation for March in 2020. Both these types of studies would be rated as moderate risk of bias; 'Time trend multiple years' – This category refers to studies considering data from more than one entire year prior to the pandemic interruption. An example is a study documenting utilisation from the period January 2014 to some point in 2020. In these studies preinterruption utilisation trends may be modelled using observations from previous years to estimate utilisation that would have occurred in the absence of the pandemic.



**References of included studies**

1. Al Kuwari M, Abdulmalik M, Al Abdulla S, Haj Bakri A, Gibb J, Kandy M. The COVID-19 Pandemic Impact on Primary Health Care services: An Experience from Qatar. In:2020.
2. Andersson C, Andersson C, Gerds T, et al. Incidence of New-Onset and Worsening Heart Failure before and after the COVID-19 Epidemic Lockdown in Denmark: A Nationwide Cohort Study. *Circulation: Heart Failure*. 2020.
3. Angoulvant F, Ouldali N, Yang DD, et al. COVID-19 pandemic: Impact caused by school closure and national lockdown on pediatric visits and admissions for viral and non-viral infections, a time series analysis. *Clin Infect Dis*. 2020.
4. Antonucci M, Recupero SM, Marzio V, et al. The impact of COVID-19 outbreak on urolithiasis emergency department admissions, hospitalizations and clinical management in central Italy: a multicentric analysis. *Actas Urol Esp*. 2020.
5. Athiel Y, Civadier MS, Luton D, et al. Impact of the outbreak of SARS-CoV-2 infection on urgent gynecological care. *J Gynecol Obstet Hum Reprod*. 2020:101841.
6. Baum A, Schwartz MD. Admissions to Veterans Affairs Hospitals for Emergency Conditions During the COVID-19 Pandemic. *JAMA*. 2020;324(1):96-99.
7. Bayles B, George M, Hannah H, et al. Impact of the first COVID-19 shelter-in-place order in the United States on emergency department utilization, Marin County, California. In:2020.
8. Benazzo F, Rossi SMP, Maniscalco P, et al. The orthopaedic and traumatology scenario during Covid-19 outbreak in Italy: chronicles of a silent war. *Int Orthop*. 2020;44(8):1453-1459.
9. Bollmann A, Hohenstein S, Meier-Hellmann A, Kuhlen R, Hindricks G. Emergency hospital admissions and interventional treatments for heart failure and cardiac arrhythmias in Germany during the Covid-19 outbreak: insights from the German-wide Helios hospital network. *Eur Heart J Qual Care Clin Outcomes*. 2020;6(3):221-222.
10. Bozovich GE, Alves De Lima A, Fosco M, et al. [Collateral damage of COVID-19 pandemic in private healthcare centres of Argentina]. *Medicina (B Aires)*. 2020;80 Suppl 3:37-41.
11. Braiteh N, Rehman WU, Alom M, et al. Decrease in acute coronary syndrome presentations during the COVID-19 pandemic in upstate New York. *Am Heart J*. 2020;226:147-151.

12. Bramer CA, Kimmins LM, Swanson R, et al. Decline in Child Vaccination Coverage During the COVID-19 Pandemic - Michigan Care Improvement Registry, May 2016-May 2020. *MMWR Morb Mortal Wkly Rep.* 2020;69(20):630-631.
13. Butt AA, Kartha AB, Asaad N, Azad AM, Bertollini R, Abou-Samra A-B. Impact of COVID-19 Upon Changes in Emergency Room Visits with Chest Pain of Possible Cardiac Origin. *medRxiv.* 2020.
14. Cano-Valderrama O, Morales X, Ferrigni CJ, et al. Acute Care Surgery during the COVID-19 pandemic in Spain: Changes in volume, causes and complications. A multicentre retrospective cohort study. *Int J Surg.* 2020;80:157-161.
15. Cheek JA, Craig SS, West A, Lewena S, Hiscock H. Emergency department utilisation by vulnerable paediatric populations during the COVID-19 pandemic. *Emerg Med Australas.* 2020.
16. Chou YC, Yen YF, Feng RC, et al. Impact of the COVID-19 Pandemic on the Utilization of Hospice Care Services: A Cohort Study in Taiwan. *J Pain Symptom Manage.* 2020.
17. Claeys MJ, Argacha JF, Collart P, et al. Impact of COVID-19-related public containment measures on the ST elevation myocardial infarction epidemic in Belgium: a nationwide, serial, cross-sectional study. *Acta Cardiologica.* 2020.
18. Clerici M, Durbano F, Spinogatti F, Vita A, de Girolamo G, Micciolo R. Psychiatric hospitalization rates in Italy before and during COVID-19: did they change? An analysis of register data. *Ir J Psychol Med.* 2020:1-8.
19. Collado-Mesa F, Kaplan SS, Yepes MM, Thurber MJ, Behjatnia B, Kallos NPL. Impact of COVID-19 on breast imaging case volumes in South Florida: A multicenter study. *Breast Journal.* 2020.
20. Consortium C-C-U, Ball S, Banerjee A, et al. The 4C Initiative (Clinical Care for Cardiovascular disease in the COVID-19 pandemic): monitoring the indirect impact of the coronavirus pandemic on services for cardiovascular diseases in the UK. In:2020.
21. De Filippo O, D'Ascenzo F, Angelini F, et al. Reduced Rate of Hospital Admissions for ACS during Covid-19 Outbreak in Northern Italy. *N Engl J Med.* 2020;383(1):88-89.
22. de Havenon A, Ney J, Callaghan B, et al. A Rapid Decrease in Stroke, Acute Coronary Syndrome, and Corresponding Interventions at 65 United States Hospitals Following Emergence of COVID-19. *medRxiv.* 2020.
23. De Rosa S, Spaccarotella C, Basso C, et al. Reduction of hospitalizations for myocardial infarction in Italy in the COVID-19 era. *Eur Heart J.* 2020;41(22):2083-2088.

24. Diegoli H, Magalhães PSC, Martins SCO, et al. Decrease in Hospital Admissions for Transient Ischemic Attack, Mild, and Moderate Stroke During the COVID-19 Era. *Stroke*. 2020;51(8):2315-2321.
25. Egol KA, Konda SR, Bird ML, et al. Increased Mortality and Major Complications in Hip Fracture Care During the COVID-19 Pandemic: A New York City Perspective. *J Orthop Trauma*. 2020;34(8):395-402.
26. Enache B, Claessens YE, Boulay F, et al. Reduction in cardiovascular emergency admissions in Monaco during the COVID-19 pandemic. *Clin Res Cardiol*. 2020:1-2.
27. Franco F, Alessandro Z, Carlo C, et al. Impact of COVID-19 epidemic on coronary care unit accesses for acute coronary syndrome in Veneto region, Italy. *Am Heart J*. 2020;226:26-28.
28. Frankfurter C, Buchan TA, Kobulnik J, et al. Reduced rate of hospital presentations for heart failure during the Covid-19 pandemic in Toronto, Canada. *Can J Cardiol*. 2020.
29. Garcia S, Stanberry L, Schmidt C, et al. Impact of COVID-19 pandemic on STEMI care: An expanded analysis from the United States. *Catheter Cardiovasc Interv*. 2020.
30. Gawron AJ, Kaltenbach T, Dominitz JA. The impact of the COVID-19 pandemic on access to endoscopy procedures in the VA healthcare system. *Gastroenterology*. 2020.
31. Giuntoli M, Bonicoli E, Bugelli G, Valesini M, Manca M, Scaglione M. Lessons learnt from COVID 19: An Italian multicentric epidemiological study of orthopaedic and trauma services. *J Clin Orthop Trauma*. 2020;11(4):721-727.
32. Gruttadauria S. Preliminary Analysis of the Impact of the Coronavirus Disease 2019 Outbreak on Italian Liver Transplant Programs. *Liver Transpl*. 2020;26(7):941-944.
33. Hartnett KP, Kite-Powell A, DeVies J, et al. Impact of the COVID-19 Pandemic on Emergency Department Visits - United States, January 1, 2019-May 30, 2020. *MMWR Morb Mortal Wkly Rep*. 2020;69(23):699-704.
34. Houshyar R, Tran-Harding K, Glavis-Bloom J, et al. Effect of shelter-in-place on emergency department radiology volumes during the COVID-19 pandemic. *Emerg Radiol*. 2020:1-4.
35. Hoyer C, Ebert A, Huttner HB, et al. Acute Stroke in Times of the COVID-19 Pandemic: A Multicenter Study. *Stroke*. 2020;51(7):2224-2227.

36. Isba R, Edge R, Jenner R, Broughton E, Francis N, Butler J. Where have all the children gone? Decreases in paediatric emergency department attendances at the start of the COVID-19 pandemic of 2020. *Arch Dis Child*. 2020;105(7):704.
37. Jasne AS, Chojecka P, Maran I, et al. Stroke Code Presentations, Interventions, and Outcomes Before and During the COVID-19 Pandemic. *Stroke*. 2020;Str0000000000000347.
38. Kadavath S, Mohan J, Ashraf S, et al. Cardiac Catheterization Laboratory Volume Changes During COVID-19—Findings from a Cardiovascular Fellows Consortium. *American Journal of Cardiology*. 2020;130:168-169.
39. Kerleroux B, Fabacher T, Bricout N, et al. Mechanical Thrombectomy for Acute Ischemic Stroke Amid the COVID-19 Outbreak: Decreased Activity, and Increased Care Delays. *Stroke*. 2020;51(7):2012-2017.
40. Kessler T, Graf T, Hilgendorf I, et al. Hospital Admissions with Acute Coronary Syndromes During the COVID-19 Pandemic in German Cardiac Care Units. *Cardiovasc Res*. 2020.
41. Kim HS, Cruz DS, Conrardy MJ, et al. Emergency Department Visits for Serious Diagnoses During the COVID-19 Pandemic. *Acad Emerg Med*. 2020.
42. Kølbaek P, Nørremark B, Østergaard SD. Forty Percent Reduction in Referrals to Psychiatric Services during the COVID-19 Pandemic. *Psychother Psychosom*. 2020:1-2.
43. Krenzlin H, Bettag C, Rohde V, Ringel F, Keric N. Involuntary ambulatory triage during the COVID-19 pandemic - A neurosurgical perspective. *PLoS One*. 2020;15(6):e0234956.
44. Langdon-Embry M, Papadouka V, Cheng I, Almashhadani M, Ternier A, Zucker JR. Notes from the Field: Rebound in Routine Childhood Vaccine Administration Following Decline During the COVID-19 Pandemic - New York City, March 1-June 27, 2020. *MMWR Morb Mortal Wkly Rep*. 2020;69(30):999-1001.
45. Lantelme P, Couray Targe S, Metral P, et al. Worrying decrease in hospital admissions for myocardial infarction during the COVID-19 pandemic. *Arch Cardiovasc Dis*. 2020;113(6-7):443-447.
46. Lazaros G, Oikonomou E, Theofilis P, et al. The impact of COVID-19 pandemic on adult cardiac surgery procedures. *Hellenic J Cardiol*. 2020.
47. Lazzerini M, Barbi E, Apicella A, Marchetti F, Cardinale F, Trobia G. Delayed access or provision of care in Italy resulting from fear of COVID-19. *The Lancet Child and Adolescent Health*. 2020;4(5):e10-e11.

48. Li YH, Huang WC, Hwang JJ, on behalf of the Taiwan Society of C. No Reduction of ST-segment Elevation Myocardial Infarction Admission in Taiwan During Coronavirus Pandemic. *American Journal of Cardiology*. 2020.
49. Lui TKL, Leung K, Guo CG, Tsui VWM, Wu JT, Leung WK. Impacts of the Coronavirus 2019 Pandemic on Gastrointestinal Endoscopy Volume and Diagnosis of Gastric and Colorectal Cancers: A Population-Based Study. *Gastroenterology*. 2020.
50. Mafham MM, Spata E, Goldacre R, et al. COVID-19 pandemic and admission rates for and management of acute coronary syndromes in England. *The Lancet*. 2020;396(10248):381-389.
51. Manzoni P, Militello MA, Fiorica L, Cappiello AR, Manzionna M. Impact of COVID-19 epidemics in paediatric morbidity and utilisation of Hospital Paediatric Services in Italy. *Acta Paediatr*. 2020.
52. Mazzatenta D, Zoli M, Cavallo MA, et al. Remodulation of neurosurgical activities in an Italian region (Emilia-Romagna) under COVID-19 emergency: maintaining the standard of care during the crisis. *J Neurosurg Sci*. 2020.
53. McDonald HI, Tessier E, White JM, et al. Early impact of the coronavirus disease (COVID-19) pandemic and physical distancing measures on routine childhood vaccinations in England, January to April 2020. *Euro Surveill*. 2020;25(19).
54. Mitchell RD, O'Reilly GM, Mitra B, Smit V, Miller JP, Cameron PA. Impact of COVID-19 State of Emergency restrictions on presentations to two Victorian emergency departments. *Emerg Med Australas*. 2020.
55. Naidich JJ, Boltyenkov A, Wang JJ, Chusid J, Hughes D, Sanelli PC. Impact of the Coronavirus Disease 2019 (COVID-19) Pandemic on Imaging Case Volumes. *J Am Coll Radiol*. 2020;17(7):865-872.
56. Norbash AM, Moore AV, Jr., Recht MP, et al. Early-Stage Radiology Volume Effects and Considerations with the Coronavirus Disease 2019 (COVID-19) Pandemic: Adaptations, Risks, and Lessons Learned. *J Am Coll Radiol*. 2020.
57. Novara G, Bartoletti R, Crestani A, et al. Impact of the COVID-19 pandemic on urological practice in emergency departments in Italy. *BJU Int*. 2020;126(2):245-247.
58. Onteddu SR, Nalleballe K, Sharma R, Brown AT. Underutilization of health care for strokes during the COVID-19 outbreak. *International Journal of Stroke*. 2020;15(5):NP9-NP10.
59. Papafaklis MI, Katsouras CS, Tsigkas G, et al. "Missing" acute coronary syndrome hospitalizations during the COVID-19 era in Greece: Medical care avoidance combined with a true reduction in incidence? *Clinical Cardiology*. 2020.

60. Pignon B, Gourevitch R, Tebeka S, et al. Dramatic reduction of psychiatric emergency consultations during lockdown linked to COVID-19 in Paris and suburbs. *Psychiatry Clin Neurosci*. 2020.
61. Pinar U, Anract J, Duquesne I, et al. [Impact of the COVID-19 pandemic on surgical activity within academic urological departments in Paris]. *Prog Urol*. 2020;30(8-9):439-447.
62. Polo López L, Centella Hernández T, González Calle A, et al. Cirugía de cardiopatías congénitas en España durante el estado de alarma por COVID-19. *Cirugía Cardiovascular*. 2020;27(4):137-141.
63. Pop R, Quenardelle V, Hasiu A, et al. Impact of the COVID-19 outbreak on acute stroke pathways - insights from the Alsace region in France. *Eur J Neurol*. 2020.
64. Qasim Z, Sjöholm LO, Volgraf J, et al. Trauma center activity and surge response during the early phase of the COVID-19 pandemic - the Philadelphia story. *J Trauma Acute Care Surg*. 2020.
65. Range G, Hakim R, Motreff P. Where have the ST-segment elevation myocardial infarctions gone during COVID-19 lockdown? *Eur Heart J Qual Care Clin Outcomes*. 2020;6(3):223-224.
66. Reeves K, Watson S, Pankhurst T, et al. No Evidence for Reduced Hospital Admissions or Increased Deaths from Stroke or Heart Attack During COVID-19. In: *medRxiv*; 2020.
67. Requena A, Cruz M, Vergara V, Prados N, Galliano D, Pellicer A. A picture of the covid-19 impact on IVIRMA fertility treatment clinics in Spain and Italy. *Reprod Biomed Online*. 2020;41(1):1-5.
68. Romaguera R, Ribera A, Guell-Viaplana F, et al. Decrease in ST-segment elevation myocardial infarction admissions in Catalonia during the COVID-19 pandemic. *Rev Esp Cardiol (Engl Ed)*. 2020;73(9):778-780.
69. Salerno R, Conti CB, De Silvestri A, Campbell Davies SE, Mezzina N, Ardizzone S. The impact of covid-19 pandemic on urgent endoscopy in Italy: a nation-wide multicenter study. *Scand J Gastroenterol*. 2020;55(7):870-876.
70. Santana R, Sousa JS, Soares P, Lopes S, Boto P, Rocha JV. The Demand for Hospital Emergency Services: Trends during the First Month of COVID-19 Response. *Portuguese Journal of Public Health*. 2020.
71. Scaramuzza A, Tagliaferri F, Bonetti L, et al. Changing admission patterns in paediatric emergency departments during the COVID-19 pandemic. *Arch Dis Child*. 2020;105(7):704-706.

72. Scholz KH, Lengenfelder B, Thilo C, et al. Impact of COVID-19 outbreak on regional STEMI care in Germany. *Clin Res Cardiol.* 2020;1-11.
73. Secco GG, Zocchi C, Parisi R, et al. Decrease and Delay in Hospitalization for Acute Coronary Syndromes During the 2020 SARS-CoV-2 Pandemic. *Can J Cardiol.* 2020;36(7):1152-1155.
74. Seiffert M, Brunner FJ, Rimmel M, et al. Temporal trends in the presentation of cardiovascular and cerebrovascular emergencies during the COVID-19 pandemic in Germany: an analysis of health insurance claims. *Clin Res Cardiol.* 2020:1-9.
75. Smalley CM, Malone DA, Jr., Meldon SW, et al. The impact of COVID-19 on suicidal ideation and alcohol presentations to emergency departments in a large healthcare system. *Am J Emerg Med.* 2020.
76. Tinay I, Ozden E, Suer E, et al. The Early Impact of COVID-19 Pandemic on Surgical Urologic Oncology Practice in Turkey: Multi-Institutional Experience From Different Geographic Areas. *Urology.* 2020;142:29-31.
77. Toro L, Parra A, Alvo M. [COVID-19 epidemic in chile: impact on emergency services care and specific pathologies]. *Rev Med Chil.* 2020;148(4):558-560.
78. Toyoda H, Huang DQ, Le MH, Nguyen MH. Liver Care and Surveillance: The Global Impact of the COVID-19 Pandemic. *Hepatology Communications.* 2020.
79. Wong JSH, Cheung KMC. Impact of COVID-19 on Orthopaedic and Trauma Service: An Epidemiological Study. *J Bone Joint Surg Am.* 2020;102(14):e80.
80. Xu D, Starr MR, Boucher N, et al. Real-world vitreoretinal practice patterns during the 2020 COVID-19 pandemic: a nationwide, aggregated health record analysis. *Curr Opin Ophthalmol.* 2020;31(5):427-434.
81. Zhao J, Li H, Kung D, Fisher M, Shen Y, Liu R. Impact of the COVID-19 Epidemic on Stroke Care and Potential Solutions. *Stroke.* 2020;51(7):1996-2001.

5.2 Table Percentage change in healthcare utilisation for each individual study grouped by category of healthcare utilisation.

| Study             | Outcome                           | Comparator time period* | Weeks being compared | Total volume of services       | % Change (95% CI)         |
|-------------------|-----------------------------------|-------------------------|----------------------|--------------------------------|---------------------------|
| <b>Admissions</b> |                                   |                         |                      |                                |                           |
| <b>Andersson</b>  | Worsening HF                      | 2019                    | 12 to 13             | 568                            | -30                       |
|                   |                                   |                         |                      | (C: 353; P: 215)               |                           |
| <b>Angoulvant</b> | Ped ED Hospitalisation            | 2017/18/19**            | 12 to 16             | NR                             | -45<br>(-32.4 to -57.0)   |
| <b>Athiel</b>     | Gynaecological ED Hospitalisation | 2019                    | 10 to 22             | 1761                           | -20<br>(C: 976; P: 785)   |
| <b>Baum</b>       | Admissions for any cause          | 2019                    | 11 to 16             | 130353<br>(C: 85326; P: 45027) | -43<br>(-36.0 to -49.0)   |
| <b>Bollmann</b>   | HF                                | 2019                    | 10 to 18             | 6424<br>(C: 3604; P: 2820)     | -21.8<br>(-18.0 to -26.0) |
| <b>Bollmann</b>   | Bradycardia                       | 2019                    | 10 to 18             | 624<br>(C: 334; P: 290)        | -13.2<br>(-26.0 to +1.0)  |
| <b>Bollmann</b>   | Atrial Fibrillation               | 2019                    | 10 to 18             | 2962<br>(C: 1640; P: 1322)     | -19.4<br>(-13.0 to -25.0) |
| <b>Bollmann</b>   | Supraventricular tachycardia      | 2019                    | 10 to 18             | 525<br>(C: 283; P: 242)        | -14.5<br>(-28.0 to +1.0)  |
| <b>Bollmann</b>   | Ventricular tachyarrhythmia       | 2019                    | 10 to 18             | 433<br>(C: 251; P: 182)        | -27.5<br>(-13.0 to -40.0) |
| <b>Braiteh</b>    | ACS                               | 2019                    | 10 to 18             | 180<br>(C: 113; P: 67)         | -40.71                    |
| <b>Braiteh</b>    | Admissions for any cause          | 2019                    | 10 to 18             | 6108<br>(C: 3496; P: 2612)     | -25.29                    |
| <b>Claeys</b>     | STEMI                             | 2017/18/19              | 12 to 14             | NR                             | -26                       |



|                                |                             |         |          |                                   |                           |
|--------------------------------|-----------------------------|---------|----------|-----------------------------------|---------------------------|
| <b>Clerici</b>                 | Psychiatric hospitalisation | 2019    | 8 to 13  | 618<br>(C: 354; P: 264)           | -25.42                    |
| <b>CVD-Covid-UK Consortium</b> | Total                       | 2018/19 | 6 to 19  | 1113075<br>(C: 599372; P: 513703) | -58.2<br>(-57.5 to -58.9) |
| <b>De Filippo</b>              | ACS                         | 2019    | 9 to 13  | 1320<br>(C: 775; P: 545)          | -29.6<br>(-22.0 to -37.0) |
| <b>de Havenon</b>              | Stroke                      | 2018/19 | 6 to 13  | 33867<br>(C: 17380; P: 16487)     | -5.14                     |
| <b>de Havenon</b>              | ACS                         | 2018/19 | 6 to 13  | 24441<br>(C: 12111; P: 12330)     | 1.81                      |
| <b>De Rosa</b>                 | AMI                         | 2019    | 12 to 19 | 937<br>(C: 618; P: 319)           | -48.4<br>(-44.6 to -52.5) |
| <b>De Rosa</b>                 | HF                          | 2019    | 12 to 19 | 236<br>(C: 154; P: 82)            | -46.8<br>(-39.5 to -55.3) |
| <b>De Rosa</b>                 | Atrial Fibrillation         | 2019    | 12 to 19 | 129<br>(C: 88; P: 41)             | -53.4<br>(-43.9 to -64.9) |
| <b>De Rosa</b>                 | Pulmonary Embolism          | 2019    | 12 to 19 | 29<br>(C: 17; P: 12)              | -29.4<br>(-0.14 to -0.61) |
| <b>Diegoli</b>                 | Stroke                      | 2019    | 8 to 16  | 1169<br>(C: 713; P: 456)          | -36.15<br>(-7.7 to -64.6) |
| <b>Egol</b>                    | Hip fracture                | 2019    | 6 to 16  | 253<br>(C: 115; P: 138)           | 20                        |
| <b>Enache</b>                  | Cardiovascular disease      | 2019    | 10 to 13 | 765<br>(C: 419; P: 346)           | -17.42                    |
| <b>Franco</b>                  | STEMI                       | 2019    | 9 to 13  | 215<br>(C: 105; P: 110)           | 4.8                       |
| <b>Franco</b>                  | NSTEMI                      | 2019    | 9 to 13  | 1249<br>(C: 1105; P: 144)         | -87                       |
| <b>Frankfurter</b>             | Worsening HF                | 2019    | 10 to 16 | 256<br>(C: 149; P: 107)           | -39.3<br>(-8.6 to -78.5)  |
| <b>Hoyer</b>                   | Strokes admissions          | 2019    | 10 to 15 | NR                                | -15.2                     |
| <b>Hoyer</b>                   | TIA admissions              | 2019    | 10 to 15 | NR                                | -38.5                     |
| <b>Jasne</b>                   | Strokes admissions          | 2019    | 8 to 17  | 863                               | -37.2                     |

|                     |                                               |               |          |                                |                            |
|---------------------|-----------------------------------------------|---------------|----------|--------------------------------|----------------------------|
|                     |                                               |               |          | (C: 530; P: 333)               |                            |
| <b>Kessler</b>      | ACS                                           | 2019          | 10 to 18 | 5920<br>(C: 3411; P: 2509)     | -27<br>(-23.0 to -30.0)    |
| <b>Lantelme</b>     | AMI                                           | 2019          | 11 to 14 | 240<br>(C: 142; P: 98)         | -30.99                     |
| <b>Li</b>           | STEMI                                         | 2019          | 6 to 18  | 2130<br>(C: 1092; P: 1038)     | -4.95                      |
| <b>Mafham</b>       | ACS                                           | 2019          | 2 to 22  | 120076<br>(C: 65375; P: 54701) | -40<br>(-37 to -43)        |
| <b>Manzoni</b>      | Ped                                           | 2019          | 10 to 18 | 91<br>(C: 73; P: 18)           | -75                        |
| <b>Onteddu</b>      | Strokes                                       | 2019          | 4 to 20  | 104615<br>(C: 66674; P: 37941) | -43.09                     |
| <b>Papafaklis</b>   | ACS                                           | 2019          | 10 to 15 | 1848<br>(C: 1077; P: 771)      | -28.41<br>(-21.0 to -35.0) |
| <b>Reeves</b>       | STEMI                                         | 2016/17/18/19 | 13 to 17 | 155<br>(C: 85; P: 70)          | -17.3                      |
| <b>Reeves</b>       | Stroke                                        | 2016/17/18/19 | 13 to 17 | 230<br>(C: 175; P: 155)        | -15.6                      |
| <b>Romaguera</b>    | STEMI                                         | 2019          | 10 to 16 | 919<br>(C: 524; P: 395)        | -24.6<br>(-14.0 to -34.0)  |
| <b>Secco</b>        | ACS                                           | 2019          | 10 to 13 | 246<br>(C: 162; P: 84)         | -48.15<br>(-33.0 to -61.0) |
| <b>Seiffert</b>     | Cardiovascular or cerebrovascular emergencies | 2019          | 10 to 22 | 67443<br>(C: 35841; P: 31602)  | -14.97                     |
| <b>Zhao</b>         | Stroke                                        | 2019          | 6 to 9   | 56306<br>(C: 34725; P: 21581)  | -37.9                      |
| <b>Diagnostics</b>  |                                               |               |          |                                |                            |
| <b>Collado-Mesa</b> | Breast imaging                                | 2018/19       | 14 to 18 | 8239<br>(C: 7142; P: 1097)     | -84.64                     |
| <b>Houshyar</b>     | ED volume of all imaging                      | 2019          | 13 to 14 | 5871<br>(C: 3552; P: 2319)     | -34.7<br>(-12.0 to -57.4)  |

|                                            |                                                                          |            |          |                                  |                           |
|--------------------------------------------|--------------------------------------------------------------------------|------------|----------|----------------------------------|---------------------------|
|                                            | (MRI, CT, x-ray, US, fluoroscopy)                                        |            |          |                                  |                           |
| <b>Lui</b>                                 | Upper endoscopies                                                        | 2017/18/19 | 4 to 13  | 2700<br>(C: 1813; P: 887)        | -51.1                     |
| <b>Lui</b>                                 | Lower endoscopies                                                        | 2017/18/19 | 4 to 13  | 1681<br>(C: 1190; P: 491)        | -58.7                     |
| <b>Naidich</b>                             | Total imaging volume                                                     | 2019       | 10 to 16 | 408067<br>(C: 237388; P: 170679) | -28.1                     |
| <b>Naidich</b>                             | ED imaging volume                                                        | 2019       | 10 to 16 | 195160<br>(C: 112579; P: 82581)  | -26.6                     |
| <b>Naidich</b>                             | Inpatient imaging volume                                                 | 2019       | 10 to 16 | 147070<br>(C: 78902; P: 68168)   | -13.6                     |
| <b>Naidich</b>                             | Outpatient imaging volume                                                | 2019       | 10 to 16 | 65837<br>(C: 45907; P: 19930)    | -56.6                     |
| <b>Norbash</b>                             | All radiological requests                                                | 2019       | 2 to 21  | 282749<br>(C: 203132; P: 79617)  | -21.8                     |
| <b>Toyoda</b>                              | Abdominal US                                                             | 2018/19    | 6 to 18  | 4506<br>(C: 2566; P: 1940)       | -24.4                     |
| <b>Toyoda</b>                              | Abdominal CT/MRIs                                                        | 2018/19    | 6 to 18  | 3553<br>(C: 1874; P: 1679)       | -10.38                    |
| <b>Xu</b>                                  | Optical coherence tomography, indocyanine green, fluorescent angiography | 2018/19    | 11 to 20 | 566955<br>(C: 355458; P: 211497) | -40.5<br>(-26.4 to -54.7) |
| <b>Therapeutics, Procedures, Surgeries</b> |                                                                          |            |          |                                  |                           |
| <b>Benazzo</b>                             | Trauma surgeries                                                         | 2019       | 9 to 14  | 1011<br>(C: 559; P: 452)         | -19.2                     |
| <b>Benazzo</b>                             | Femoral neck fracture surgeries                                          | 2019       | 9 to 14  | 656<br>(C: 349; P: 307)          | -12.2                     |
| <b>Bollmann</b>                            | Catheter ablations                                                       | 2019       | 10 to 18 | 472<br>(C: 264; P: 208)          | -21.2<br>(-6.0 to -44.0)  |
| <b>Bollmann</b>                            | CRM device implantations                                                 | 2019       | 10 to 18 | 675<br>(C: 365; P: 310)          | -15.1<br>(-1.0 to -27.0)  |

|                        |                                         |            |          |                               |                            |
|------------------------|-----------------------------------------|------------|----------|-------------------------------|----------------------------|
| <b>Bozovich</b>        | Coronary angioplasties                  | 2019       | 14 to 18 | 1330<br>(C: 946; P: 384)      | -59.41<br>(-50.0 to -67.0) |
| <b>Bozovich</b>        | Heart surgeries                         | 2019       | 14 to 18 | 400<br>(C: 282; P: 118)       | -58.16<br>(-46.0 to -100)  |
| <b>Bozovich</b>        | PCI                                     | 2019       | 14 to 18 | 2501<br>(C: 1850; P: 651)     | -64.81<br>(-50.0 to -78.0) |
| <b>Bozovich</b>        | General surgeries                       | 2019       | 14 to 18 | 24805<br>(C: 19600; P: 5205)  | -73.44<br>(-62.0 to -75.0) |
| <b>Bozovich</b>        | Chemotherapy and radiotherapy           | 2019       | 14 to 18 | 9227<br>(C: 5005; P: 4222)    | -15.64<br>(-3.0 to -52.0)  |
| <b>Bozovich</b>        | GI endoscopies                          | 2019       | 14 to 18 | 8549<br>(C: 7137; P: 1412)    | -80.22<br>(-77.0 to -93.0) |
| <b>Bramer</b>          | Non-influenza immunisation for children | 2017/18/19 | 1 to 18  | NR                            | -21.5                      |
| <b>Cano-Valderrama</b> | Acute surgeries                         | 2019       | 12 to 17 | 402<br>(C: 285; P: 117)       | -58.95                     |
| <b>de Havenon</b>      | MT                                      | 2018/19    | 6 to 13  | 725<br>(C: 319; P: 406)       | 27.3                       |
| <b>de Havenon</b>      | tPA                                     | 2018/19    | 6 to 13  | 570<br>(C: 266; P: 304)       | 14.3                       |
| <b>de Havenon</b>      | PCI                                     | 2018/19    | 6 to 13  | 2596<br>(C: 1330; P: 1266)    | -4.81                      |
| <b>Garcia</b>          | Cardiac catheterisation                 | 2019       | 10 to 18 | 1332<br>(C: 779; P: 553)      | -29.1                      |
| <b>Gawron</b>          | Gastrointestinal endoscopies            | 2019       | 10 to 18 | 34053<br>(C: 23455; P: 10598) | -54.81                     |
| <b>Gawron</b>          | Colonoscopies                           | 2019       | 10 to 18 | 57183<br>(C: 43371; P: 13812) | -68.15                     |
| <b>Giuntoli</b>        | Scheduled orthopaedic procedures        | 2019       | 10 to 13 | 583<br>(C: 444; P: 139)       | -68.69                     |

|                      |                                              |         |          |                                  |                         |
|----------------------|----------------------------------------------|---------|----------|----------------------------------|-------------------------|
| <b>Giuntoli</b>      | Trauma orthopaedic procedures                | 2019    | 10 to 13 | 488<br>(C: 270; P: 218)          | -19.26                  |
| <b>Gruttadauria</b>  | Liver transplantation and related procedures | 2018/19 | 10 to 11 | 98<br>(C: 61; P: 37)             | -39.34                  |
| <b>Kadavath</b>      | Invasive cardiac procedures                  | 2019    | 10 to 16 | 7219<br>(C: 4671; P: 2548)       | -45.45                  |
| <b>Kerleroux</b>     | MT for stroke                                | 2019    | 8 to 13  | 1512<br>(C: 844; P: 668)         | -21<br>(-18.0 to -24.0) |
| <b>Langdon-Embry</b> | Routine childhood immunisation               | 2019    | 12 to 22 | 590000<br>(C: 344000; P: 246000) | -28.49                  |
| <b>Lazaros</b>       | Cardiac surgery procedures                   | 2019    | 12 to 19 | 330<br>(C: 246; P: 84)           | -65.85                  |
| <b>Mafham</b>        | PCI after the admission day                  | 2019    | 2 to 22  | 17469<br>(C: 8055; P: 9414)      | -47<br>(-37 to -52)     |
| <b>Mafham</b>        | PCI on the admission day                     | 0       | 2 to 22  | 19277<br>(C: NR; P: NR)          | -16<br>(-7 to -24)      |
| <b>Mafham</b>        | CABG                                         | 2019    | 2 to 22  | 3196<br>(C: 2663; P: 533)        | -80<br>(-68 to -87)     |
| <b>Mafham</b>        | Angiography                                  | 2019    | 2 to 22  | 16079<br>(C: 11485; P: 4594)     | -60<br>(-53 to -65)     |
| <b>Mazzatenta</b>    | Non-urgent surgical procedures               | 2018/19 | 12 to 15 | 918<br>(C: 713; P: 205)          | -71.25                  |
| <b>Mazzatenta</b>    | Urgent surgical procedures                   | 2018/19 | 12 to 15 | 274<br>(C: 161; P: 113)          | -29.6                   |
| <b>McDonald</b>      | Hexavalent vaccine (first does)              | 2019    | 10 to 17 | 62692<br>(C: 31475; P: 31217)    | -0.82                   |
| <b>McDonald</b>      | MMR vaccine (first does)                     | 2019    | 10 to 17 | 59809<br>(C: 30989; P: 28820)    | -7                      |
| <b>Onteddu</b>       | tPA                                          | 2019    | 4 to 20  | 1841                             | -50.93                  |

|                   |                                           |               |          |                                   |                           |
|-------------------|-------------------------------------------|---------------|----------|-----------------------------------|---------------------------|
|                   |                                           |               |          | (C: 1235; P: 606)                 |                           |
| <b>Onteddu</b>    | MV                                        | 2019          | 4 to 20  | 644<br>(C: 399; P: 245)           | -38.6                     |
| <b>Pinar</b>      | Urological surgeries                      | 2019          | 12 to 13 | 1439<br>(C: 995; P: 444)          | -55.4                     |
| <b>Polo Lopez</b> | Congenital heart diseases surgeries       | 2019          | 12 to 20 | 193<br>(C: 142; P: 51)            | -51                       |
| <b>Range</b>      | Coronary angiography for STEMI            | 2019          | 10 to 13 | 430<br>(C: 246; P: 184)           | -25.2                     |
| <b>Requena</b>    | Frozen embryo transfer                    | 2019          | 6 to 12  | 4461<br>(C: 2500; P: 1961)        | -21.5                     |
| <b>Requena</b>    | IVF                                       | 2019          | 6 to 12  | 5441<br>(C: 3007; P: 2434)        | -19.1                     |
| <b>Requena</b>    | IUI                                       | 2019          | 6 to 12  | 1301<br>(C: 564; P: 467)          | -17.3                     |
| <b>Salerno</b>    | Urgent GI endoscopic procedures           | 2019          | 10 to 13 | 2305<br>(C: NR; P: NR)            | -39.49                    |
| <b>Tinay</b>      | Non-deferrable uro-oncological procedures | 2019          | 11 to 15 | 290<br>(C: 200; P: 90)            | -55                       |
| <b>Wong</b>       | Orthopaedic operations                    | 2016/17/18/19 | 5 to 13  | 928278<br>(C: 595814; P: 332464)  | -44.2<br>(-54.7 to -33.7) |
| <b>Xu</b>         | Intravitreal injections                   | 2018/19       | 11 to 20 | 454765<br>(C: 235996; P: 218769)  | -7.3<br>(2.2 to -16.8)    |
| <b>Zhao</b>       | Thrombolysis                              | 2019          | 6 to 9   | 5930<br>(C: 3422; P: 2508)        | -25.5                     |
| <b>Zhao</b>       | Thrombectomy                              | 2019          | 6 to 9   | 2268<br>(C: 1298; P: 970)         | -22.7                     |
| <b>Visits</b>     |                                           |               |          |                                   |                           |
| <b>Abdulmalik</b> | All primary care services                 | 2018/19       | 10 to 22 | 1384037<br>(C: 872691; P: 511346) | -41.41                    |

|                                         |                                      |              |          |                                  |                            |
|-----------------------------------------|--------------------------------------|--------------|----------|----------------------------------|----------------------------|
| <b>Angoulvant</b>                       | Ped ED                               | 2017/18/19** | 12 to 16 | 871543<br>(C: NR; P: NR)         | -68<br>(-55.8 to -81.2)    |
| <b>Antonucci</b>                        | ED urological                        | 2019         | 10 to 18 | 304<br>(C: 201; P: 103)          | 48.8                       |
| <b>Athiel</b>                           | Gynaecological ED                    | 2019         | 10 to 22 | 39690<br>(C: 24982; P: 14708)    | -41                        |
| <b>Bayles,<br/>preprint</b>             | ED                                   | 2018/19      | 12 to 18 | 21527<br>(C: 17230; P: 4297)     | -50.1<br>(-39.5 to -60.7)  |
| <b>Benazzo</b>                          | Orthopaedic<br>outpatient            | 2019         | 9 to 14  | 17041<br>(C: 6863; P: 10178)     | -48.3                      |
| <b>Benazzo</b>                          | ED trauma                            | 2019         | 9 to 14  | 14772<br>(C: 6050; P: 8722)      | -44.17                     |
| <b>Benazzo</b>                          | Elective<br>orthopaedic<br>surgeries | 2019         | 9 to 14  | 8113<br>(C: 3065; P: 5048)       | -64.7                      |
| <b>Bozovich</b>                         | ED                                   | 2019         | 14 to 18 | 268899<br>(C: 213947; P: 54952)  | -74.32<br>(-65.0 to -79.0) |
| <b>Butt</b>                             | ED                                   | 2019         | 10 to 18 | 102033<br>(C: 58858; P: 43175)   | -26.7                      |
| <b>Cheek</b>                            | ED                                   | 2019         | 13 to 21 | 41041<br>(C: 26871; P: 14170)    | -47.27<br>(-44.2 to -50.3) |
| <b>Chou</b>                             | Hospice home<br>care visits          | 2019         | 1 to 18  | 1516<br>(C: 777; P: 739)         | -4.89                      |
| <b>CVD-Covid-<br/>UK<br/>Consortium</b> | ED                                   | 2018/19      | 6 to 19  | 942169<br>(C: 506516; P: 435653) | -52.8<br>(-52.2 to -53.5)  |
| <b>CVD-Covid-<br/>UK<br/>Consortium</b> | ED cardiac                           | 2018/19      | 6 to 19  | NR                               | -40.2<br>(-35.6 to -45.0)  |
| <b>CVD-Covid-<br/>UK<br/>Consortium</b> | ED<br>cerebrovascular                | 2018/19      | 6 to 19  | NR                               | -31.8<br>(-26.2 to -38.0)  |

|                                |                                   |            |          |                                     |                            |
|--------------------------------|-----------------------------------|------------|----------|-------------------------------------|----------------------------|
| <b>CVD-Covid-UK Consortium</b> | ED vascular                       | 2018/19    | 6 to 19  | NR                                  | -40.6<br>(-31.5 to -50.3)  |
| <b>Frankfurter</b>             | Symptoms suggestive of HF         | 2019       | 10 to 16 | 1906<br>(C: 800; P: 1106)           | 38.3<br>(26.3 to 51.6)     |
| <b>Frankfurter</b>             | HF                                | 2019       | 10 to 16 | 314<br>(C: 186; P: 128)             | -43.5<br>(-14.8 to -79.4)  |
| <b>Giuntoli</b>                | Orthopaedic first aid visits      | 2019       | 10 to 13 | 1679<br>(C: 1301; P: 378)           | -70.95                     |
| <b>Hartnett</b>                | ED                                | 2019       | 11 to 22 | 3319945<br>(C: 2099734; P: 1220211) | -31.47                     |
| <b>Isba</b>                    | Ped ED                            | 2019       | 6 to 13  | NA<br>(C: NA; P: NA)                | -17.74                     |
| <b>Kim</b>                     | ED                                | 2019       | 11 to 18 | 68384<br>(C: 38712; P: 29672)       | -44<br>(-33.0 to -53.0)    |
| <b>Kolbaek</b>                 | Referrals to psychiatric services | 2019       | 9 to 18  | 7982<br>(C: 4419; P: 3563)          | -19.4                      |
| <b>Krenzlin</b>                | ED Neurosurgery                   | 2018/19    | 12 to 16 | 2646<br>(C: 1824; P: 822)           | -44.7<br>(-42.6 to -46.8)  |
| <b>Lazzerini</b>               | Ped ED                            | 2019       | 10 to 13 | 10826<br>(C: 8818; P: 2008)         | -77.72<br>(-73.0 to -88.0) |
| <b>Manzoni</b>                 | Ped ED                            | 2019       | 10 to 18 | 1654<br>(C: 1428; P: 226)           | -86<br>(-32.0 to -55.0)    |
| <b>Mazzatenta</b>              | Outpatient neuro-surgical         | 2018/19    | 12 to 15 | 2234<br>(C: 1768; P: 466)           | -73.6                      |
| <b>Mitchell</b>                | ED                                | 2017/18/19 | 14 to 17 | 14059<br>(C: 8643; P: 5416)         | -37.3<br>(-33.0 to -41.0)  |
| <b>Novara</b>                  | ED urological                     | 2019       | 12       | 399<br>(C: 275; P: 124)             | -54.9                      |
| <b>Pignon</b>                  | ED psychiatric                    | 2019       | 12 to 15 | 1777<br>(C: 1224; P: 553)           | -54.8                      |
| <b>Pop</b>                     | Stroke                            | 2019       | 10 to 13 | 462                                 | -39.6                      |



|                   |                               |                  |          |                                        |                            |
|-------------------|-------------------------------|------------------|----------|----------------------------------------|----------------------------|
|                   |                               |                  |          | (C: 288; P: 174)                       |                            |
| <b>Qasim</b>      | Trauma                        | 2019             | 11 to 16 | 2386<br>(C: 1328; P: 1058)             | -20.3                      |
| <b>Santana</b>    | ED                            | 2019**           | 10 to 13 | 863414<br>(C: NR; P: NR)               | -47.98                     |
| <b>Scaramuzza</b> | Ped ED                        | 2019             | 9 to 13  | 3912<br>(C: 2958; P: 954)              | -67.8                      |
| <b>Scholz</b>     | STEMI                         | 2017/18/19       | 10 to 13 | 1716<br>(C: 1329; P: 387)              | -12.64                     |
| <b>Smalley</b>    | ED                            | 2019             | 13 to 17 | 87840<br>(C: 56453; P: 31387)          | -44.4                      |
| <b>Toro</b>       | ED                            | 2015/16/17/18/19 | 10 to 18 | 5045647<br>(C: 3198508; P:<br>1847139) | -42.25                     |
| <b>Toro</b>       | Circulatory system<br>ED      | 2015/16/17/18/19 | 10 to 18 | 105471<br>(C: 58439; P: 47032)         | -19.52                     |
| <b>Toro</b>       | Stroke ED                     | 2015/16/17/18/19 | 10 to 18 | 11004<br>(C: 6385; P: 4619)            | -27.66                     |
| <b>Toyoda</b>     | Liver clinics                 | 2018/19          | 6 to 18  | 8568<br>(C: 5335; P: 3233)             | -39.4                      |
| <b>Xu</b>         | Retinal outpatient<br>clinics | 2018/19          | 11 to 20 | 813585<br>(C: 485433; P: 328152)       | -32.4<br>(-20.4 to - 44.4) |

\*this is the comparator year that studies included in their comparison to the 2020 time period; \*\*these studies compared the expected/forecasted utilisation for 2020 from data from these years

Abbreviations: ED: emergency department; HF: Heart Failure; IVF: In vitro fertilisation; IUI: Intrauterine insemination; MT: Mechanical thrombectomy; tPA: tissue Plasminogen Activator; CABG: Coronary artery bypass grafting; ACS: Acute Coronary Syndrome; AMI: Acute Myocardial Infarction; STEMI: ST Elevation Myocardial Infarction; MRI: Magnetic Resonance Imagine; CT: computerized tomography; US: Ultrasonography; CRM: Cardiac rhythm management; PCI: Percutaneous Coronary Interventions; GI: Gastrointestinal

For studies that reported the changes in healthcare services as incidence rate ratios, IRR, we estimated the % change in healthcare services as  $100 * (1 - \text{IRR})$ . For example, IRR of 0.75 converted to 25% reduction in healthcare services

## 5.3 Table of results of secondary outcomes of the included studies

| Study           | Secondary Outcome                                                  | Change in proportions of severe patients* | P-value, if provided |
|-----------------|--------------------------------------------------------------------|-------------------------------------------|----------------------|
| Andersson       | Mortality                                                          | No change                                 | 0.45                 |
| Braiteh         | STEMI/NSTEMI                                                       | No change                                 | NR                   |
| Butt            | % ACS from those presented with cardiac symptoms                   | Increase                                  | NR                   |
| Cano-Valderrama | SOFA score >0                                                      | No change                                 | 0.16                 |
| Claeys          | % Cardiac arrest                                                   | No change                                 | 0.7                  |
| Claeys          | Killip class                                                       | No change                                 | 0.7                  |
| Claeys          | Mortality                                                          | No change                                 | 0.6                  |
| Clerici         | Voluntary/involuntary admission                                    | Increase                                  | NR                   |
| Collado-Mesa    | Positive biopsy (diagnostic yield)                                 | No change                                 | NR                   |
| CVD-COVID       | Procedures for cardiac, cerebrovascular, other vascular conditions | No change                                 | NR                   |
| De Rosa         | Mortality                                                          | Increase                                  | <0.001               |
| De Rosa         | STEMI/NSTEMI                                                       | Increase                                  | NR                   |
| De-Filippo      | STEMI/NSTEMI                                                       | No change                                 | 0                    |
| Diegoli         | Admissions for severe stroke (NIH stroke scale score)              | Increase                                  | NR                   |
| Egol            | Mortality (In-patient and 30 day)                                  | Increase                                  | 0.005-0.035          |
| Egol            | Non-operative cases                                                | No change                                 | 0.793                |
| Frankfurter     | Hospitalisation                                                    | No change                                 | 0.22                 |
| Frankfurter     | ICU admission                                                      | No change                                 | 0.86                 |
| Frankfurter     | In-hospital mortality                                              | No change                                 | 0.05                 |
| Frankfurter     | NYHA class III-IV                                                  | No change                                 | 0.3                  |
| Giuntoli        | Hospitalisation                                                    | Increase                                  | NR                   |
| Hoyer           | Stroke/TIA                                                         | Increase                                  | NR                   |
| Kerleroux       | % unwitnessed onset                                                | Increase                                  | 0.004                |
| Kerleroux       | ASPECTs score                                                      | Increase                                  | 0.041                |

|                   |                                                                                                  |           |        |
|-------------------|--------------------------------------------------------------------------------------------------|-----------|--------|
| <b>Kerleroux</b>  | Baseline NIHSS                                                                                   | No change | 0.279  |
| <b>Kessler</b>    | STEMI/NSTEMI                                                                                     | No change | 0      |
| <b>Lazaros</b>    | Emergency/nonemergency                                                                           | Increase  | <0.001 |
| <b>Lui</b>        | Positive rate for colon cancer                                                                   | Increase  | <0.001 |
| <b>Lui</b>        | Positive rate for gastric cancer                                                                 | No change | 0.14   |
| <b>Mafham</b>     | STEMI/NSTEMI                                                                                     | Increase  | NR     |
| <b>Manzoni</b>    | Hospitalisation                                                                                  | Increase  | <0.001 |
| <b>Mazzatenta</b> | Urgent/Nonurgent                                                                                 | Increase  | NR     |
| <b>Mitchell</b>   | Triage category                                                                                  | No change | NR     |
| <b>Novara</b>     | Hospitalisation                                                                                  | No change | 0.8    |
| <b>Novara</b>     | Triage category                                                                                  | No change | 0.06   |
| <b>Papafakis</b>  | STEMI/NSTEMI                                                                                     | Increase  | NR     |
| <b>Pignon</b>     | Hospitalisation                                                                                  | No change | 0.872  |
| <b>Pop</b>        | admission                                                                                        | Increase  | NR     |
| <b>Pop</b>        | Initial NIHSS score                                                                              | No change | 0.886  |
| <b>Qasim</b>      | Changes in % of all trauma volume that was at the highest level of acuity (described as 'alert') | Increase  | 0.006  |
| <b>Romaguera</b>  | % of patients with sudden cardiac death                                                          | No change | 0      |
| <b>Romaguera</b>  | 10-day mortality                                                                                 | No change | 0.459  |
| <b>Romaguera</b>  | Killip class II-IV                                                                               | No change | 0.8    |
| <b>Salerno</b>    | Diagnostic yield for urgent EGDs                                                                 | Increase  | <0.001 |
| <b>Salerno</b>    | Diagnostic yield for urgent lower endoscopy                                                      | No change | 0.3    |
| <b>Santana</b>    | Triage category                                                                                  | No change | 0      |
| <b>Scaramuzza</b> | Triage category                                                                                  | Increase  | 0      |
| <b>Scholz</b>     | In-hospital mortality                                                                            | No change | 0.68   |
| <b>Scholz</b>     | TIMI score                                                                                       | No change | 0.464  |
| <b>Secco</b>      | GRACE score                                                                                      | Increase  | <0.01  |
| <b>Secco</b>      | Peak troponin                                                                                    | Increase  | <0.01  |
| <b>Secco</b>      | STEMI/NSTEMI                                                                                     | Increase  | <0.01  |
| <b>Secco</b>      | Mortality                                                                                        | No change | NS     |

|                 |                                     |           |       |
|-----------------|-------------------------------------|-----------|-------|
| <b>Seiffert</b> | Acute stroke/TIA                    | Increase  | 0     |
| <b>Seiffert</b> | STEMI/NSTEMI                        | Increase  | 0     |
| <b>Seiffert</b> | In-hospital mortality               | No change | 0     |
| <b>Seiffert</b> | Intervention/surgeries              | No change | 0     |
| <b>Tinay</b>    | ASA scores                          | Increase  | 0.005 |
| <b>Toyoda</b>   | Visits in advanced disease patients | No change | 0.11  |
| <b>Wong</b>     | Emergency/elective                  | Increase  | NR    |

Note: \*This secondary outcome domain is exploring, if there is a reduction in services, whether or not there is a greater or lesser reduction in the proportion of patients/people using the service who have milder or more severe forms of illness. If there is an increase in the proportions with more severe illness - which means a greater reduction among those with milder illness – then an “increase” is recorded in this column.

#### 5.4 Figures Change in healthcare utilisation for each category of healthcare services:

Each dot represents a study estimate for each calendar week. For studies that only provided averages of changes for the whole study period, we plotted the average estimates for each calendar week of the corresponding study period.

Figure 5.4a visits

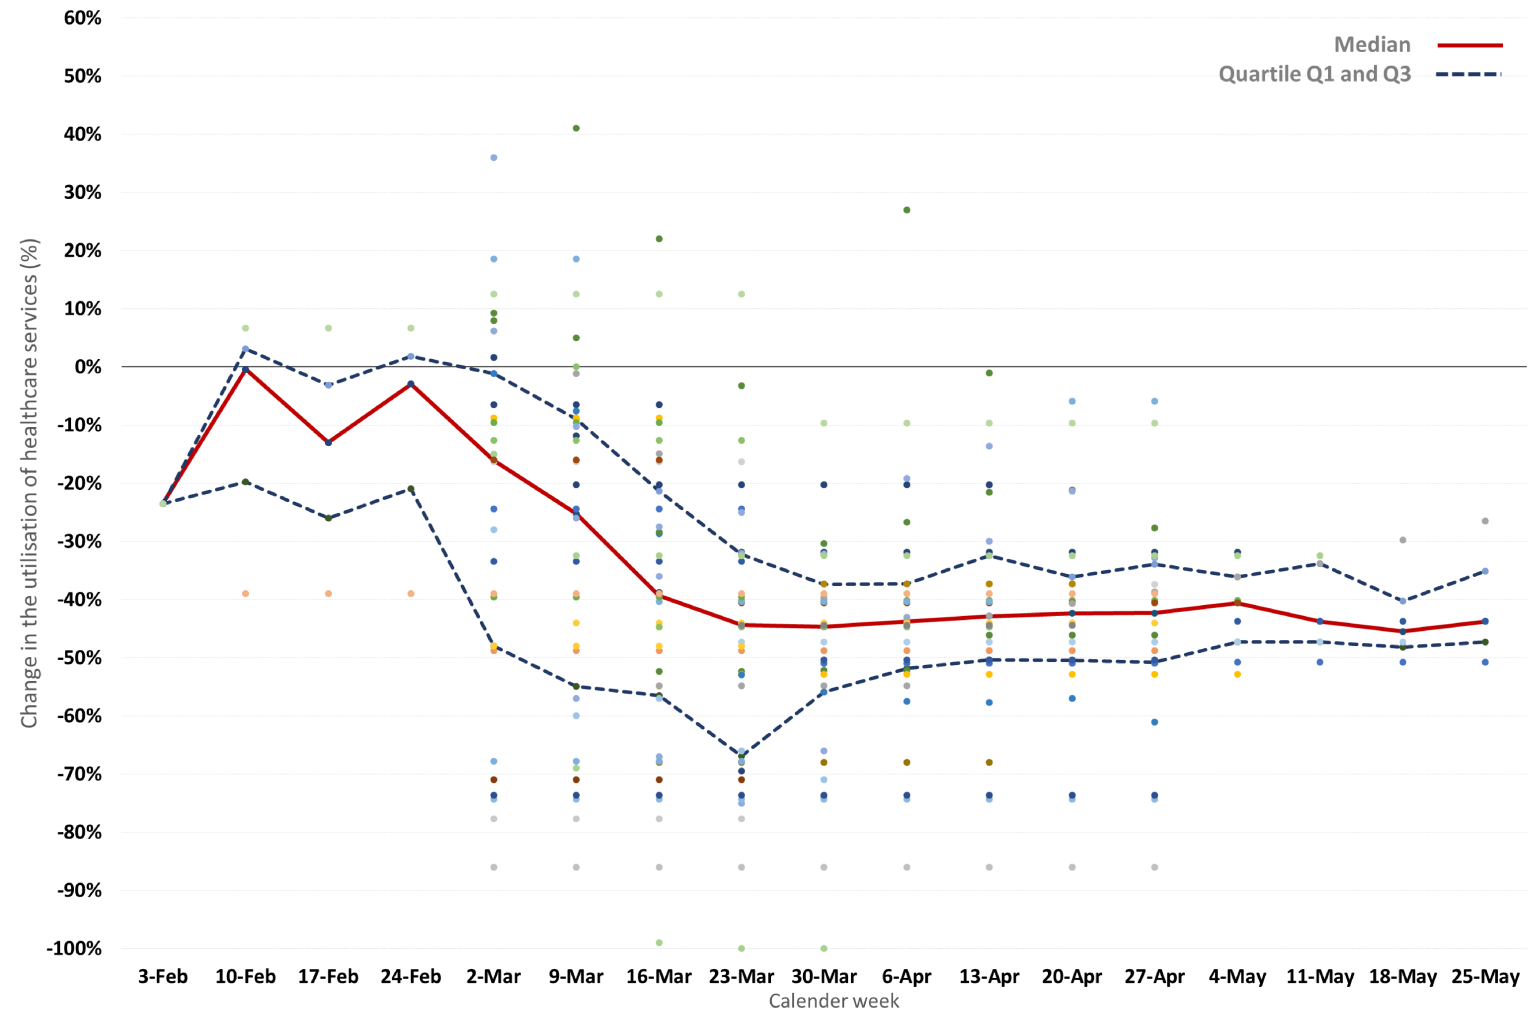

Figure 5.4b admissions

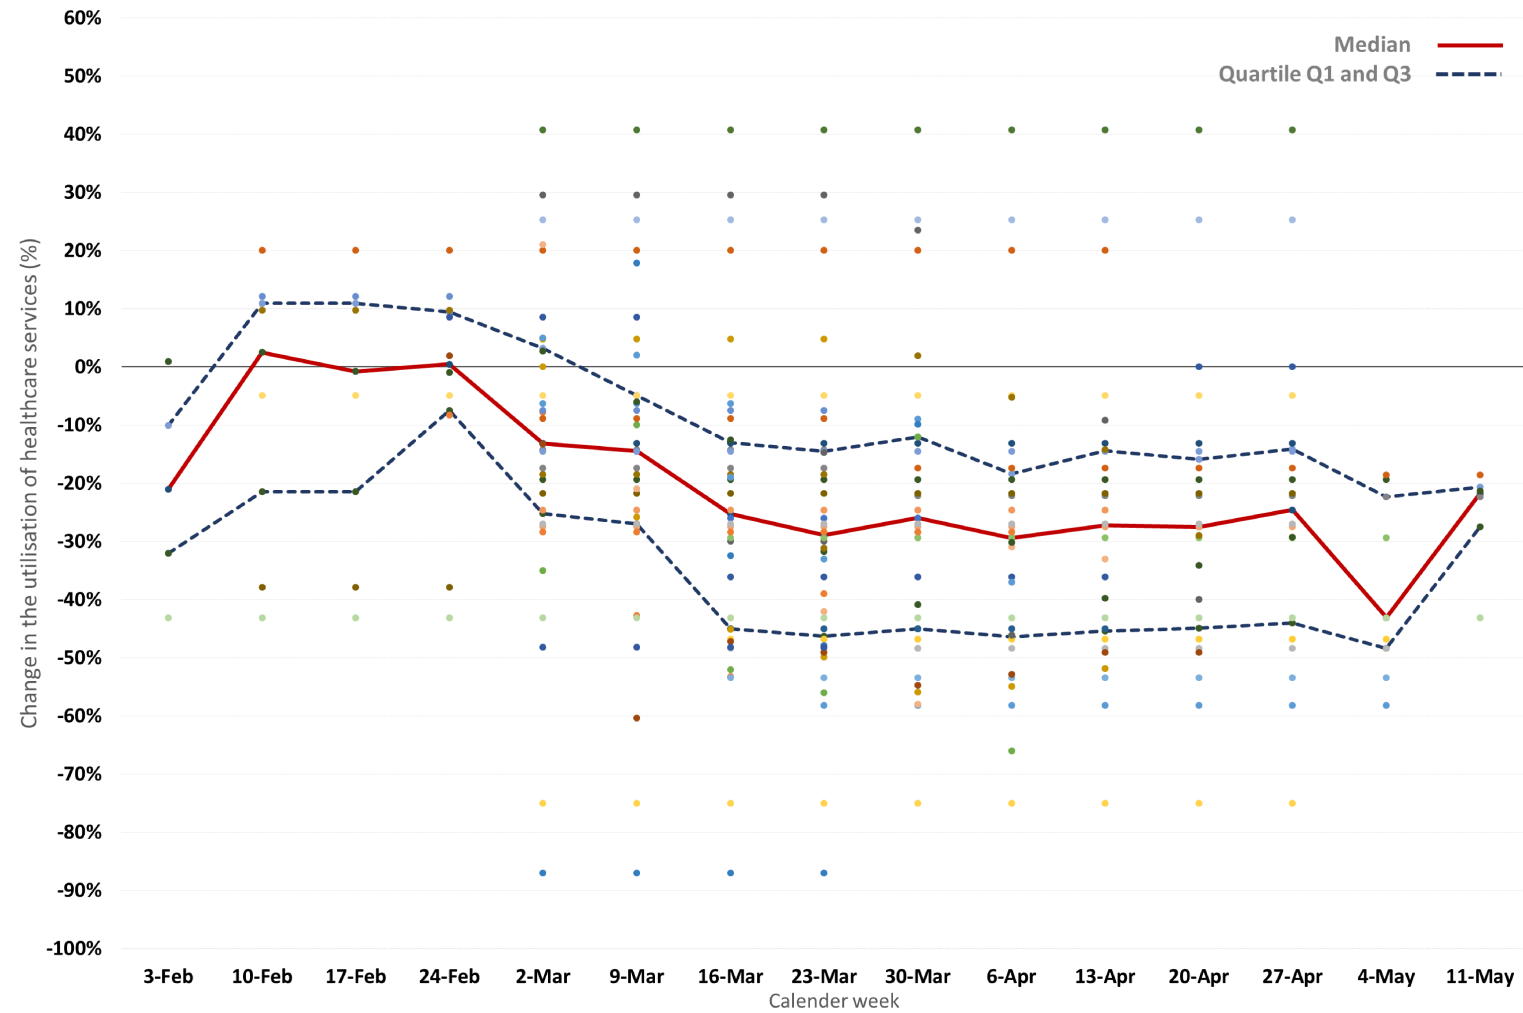

Figure 5.4c diagnostics

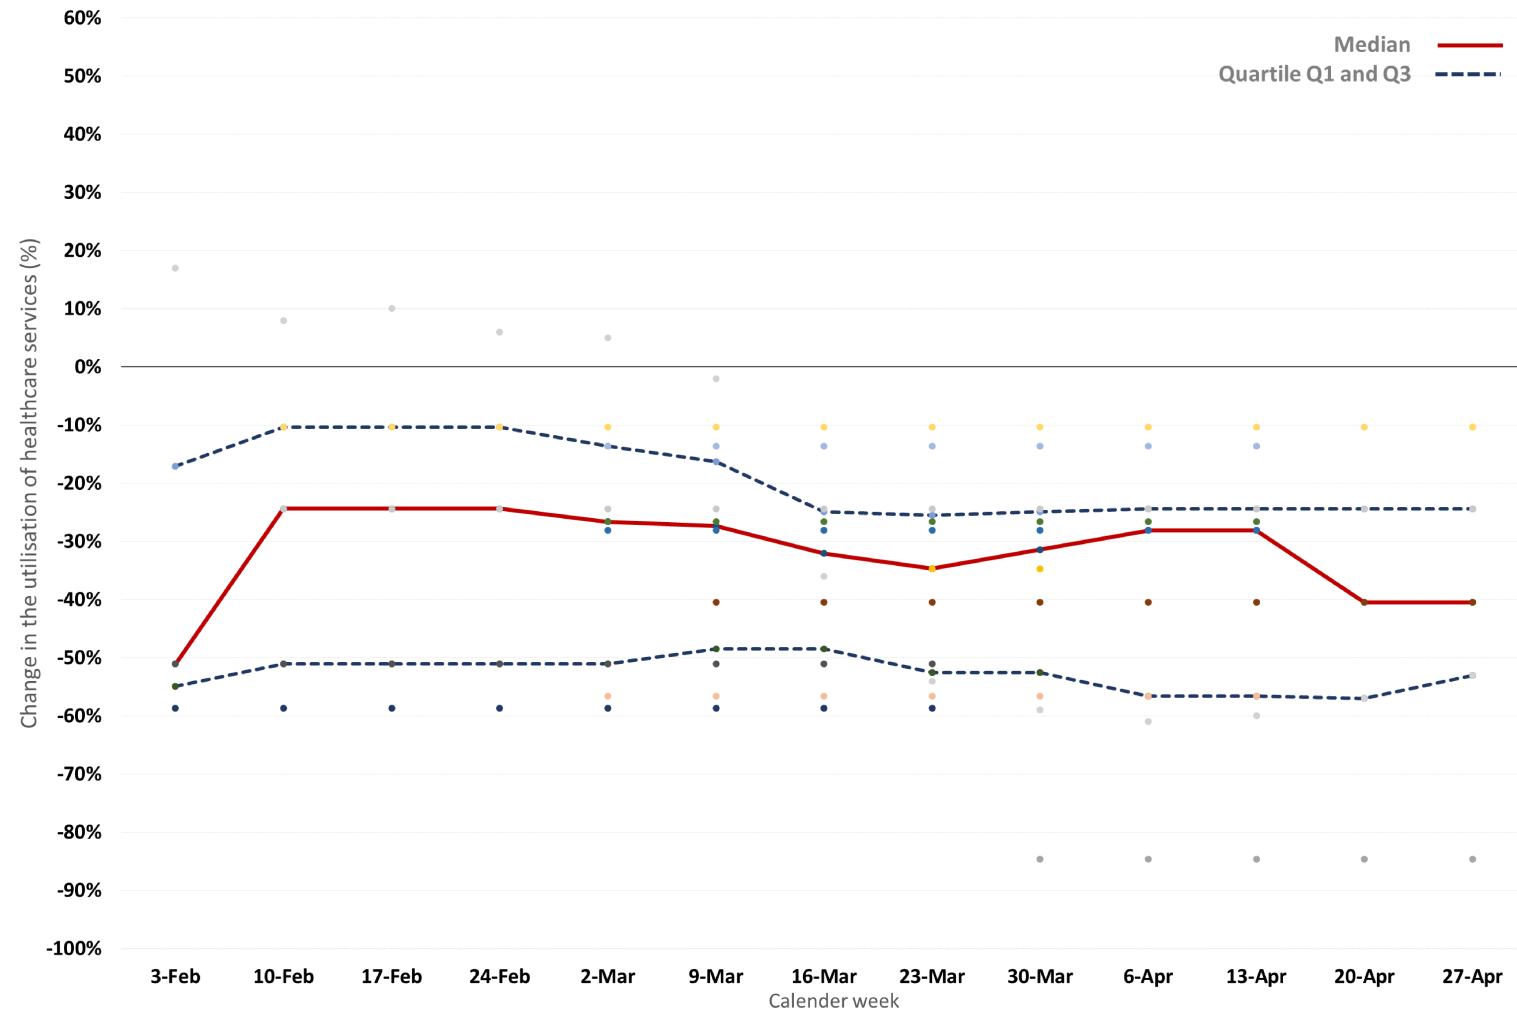



Figure 5.4d therapeutics

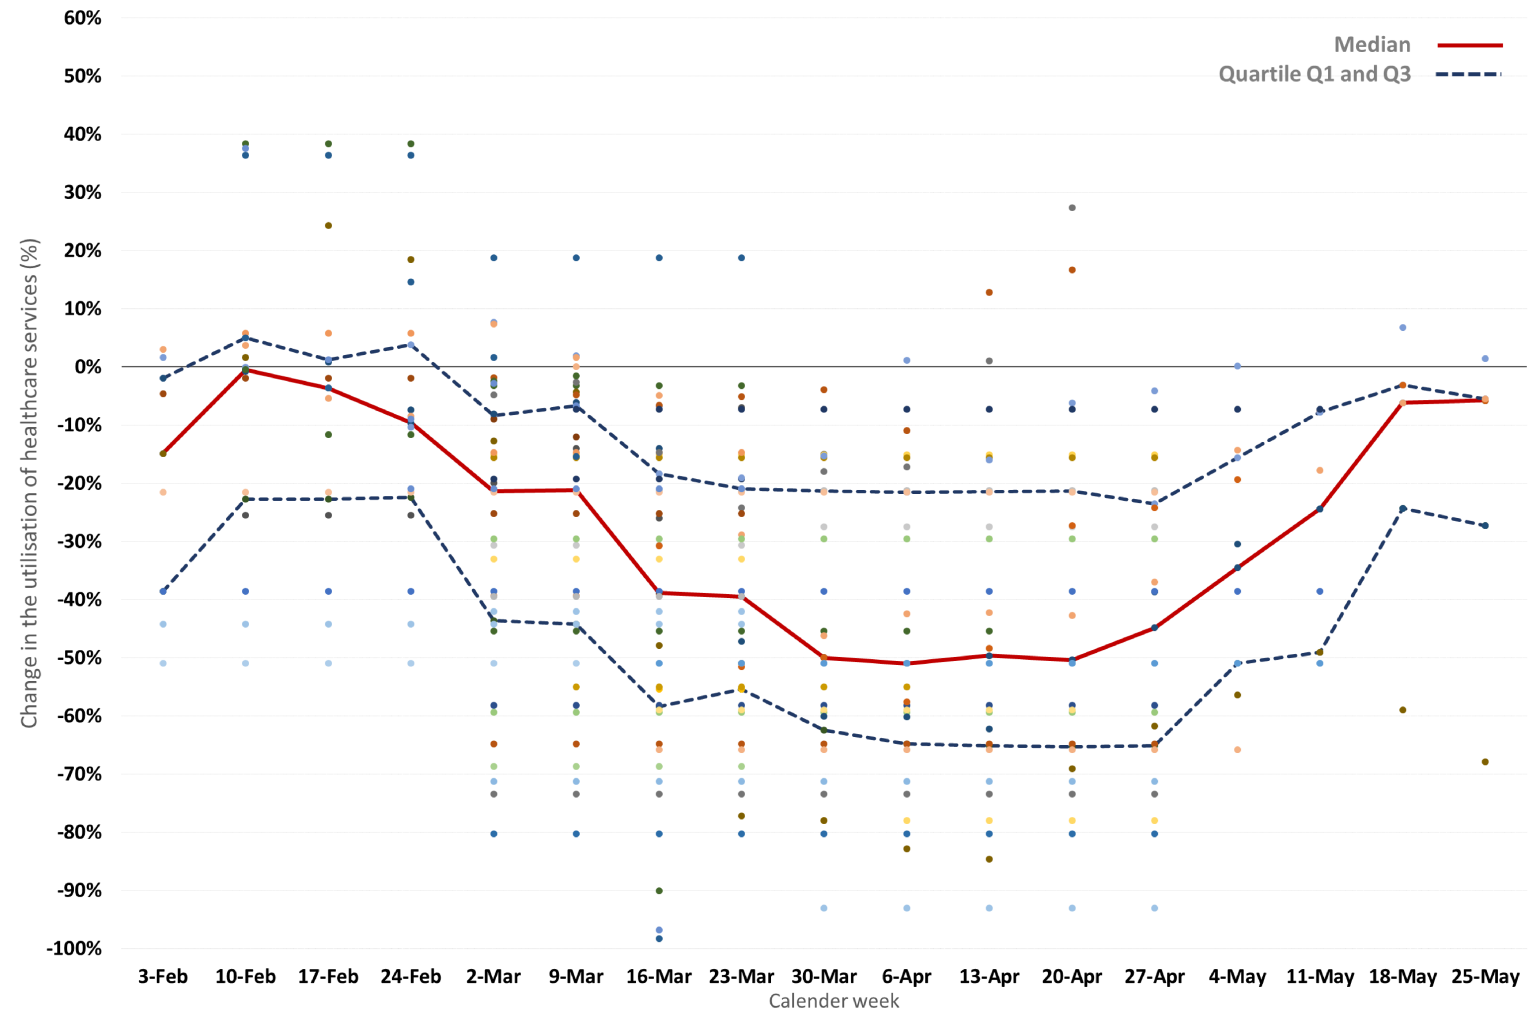

Supplement: inline-supplementary-material-5 [file inline-supplementary-material-5.pdf]
